# Supplementary material for: Mononuclear rhenium(i) complexes incorporating 2-(arylazo)phenyl benzyl thioethers: synthesis, structure, spectral, DFT and TDDFT studies
Source: Royal Society of Chemistry journal article supplement (doi:10.1039/c4ra05699j), 2014-08-13
Supplement: c4ra05699j1.pdf [file c4ra05699j1.pdf]

*RSC. Adv.*

*Electronic Supplementary Information*

**Mononuclear rhenium(I) complexes incorporating  
2-(Arylazo)phenyl benzyl thioethers: synthesis,  
structure, spectral, DFT and TDDFT study**

*Pallab Mondal, Rupa Sarkar, Amar Hens, and Kajal Krishna Rajak\**

\*Inorganic Chemistry Section, Department of Chemistry, Jadavpur University, Kolkata 700032,  
India. E-mail: kajalrajak@hotmail.com // kkrajak@chemistry.jdvu.ac.in

## IR and NMR spectra

The IR spectra of all the complexes were recorded as a KBr disc. The complexes display three metal carbonyl vibrations in the region 1904–2043  $\text{cm}^{-1}$ . These vibrations are consistent with the presence of *fac*- $[\text{Re}(\text{CO})_3]^+$  core in the complex with pseudo  $C_{3v}$  symmetry. The N=N stretches are observed  $\sim 1455 \text{ cm}^{-1}$ . The Re–Cl stretching frequency for all the complexes is observed  $\sim 305 \text{ cm}^{-1}$ . The frequencies calculated by DFT method using the gas-phase optimized structure predict three carbonyl vibrations with  $a_1$  and  $e$  symmetries<sup>1</sup> for all the complexes. The experimental and calculated IR spectral data are given in Experimental section.

The complexes are diamagnetic and display well resolved  $^1\text{H}$  and  $^{13}\text{C}$  NMR spectra in  $\text{CDCl}_3$  solution at room temperature. The assignment of NMR spectra is based on intensity and spin-spin splitting structure of Re(I) complexes.

In all the complexes the C(18)–H proton is observed as a doublet  $\sim 7.8 \text{ ppm}$ . The aromatic protons span in the range (6.95–7.94) ppm. The resonance of  $\text{CH}_2$  group attached to the coordinated sulfur atom is observed as singlet  $\sim 4.25 \text{ ppm}$ .

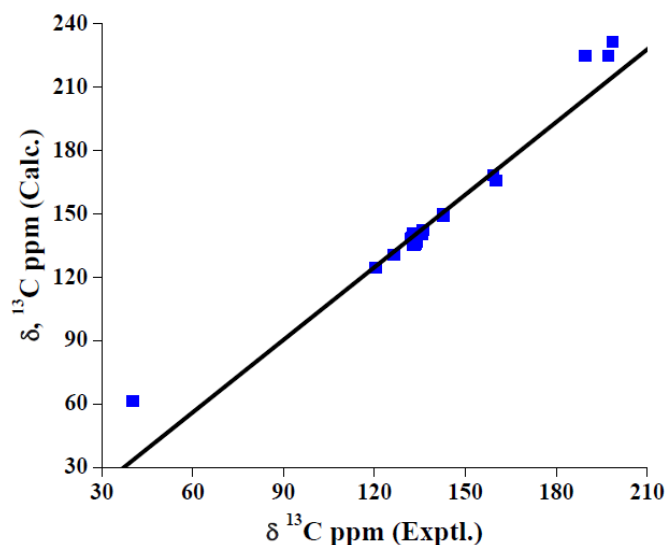

**Fig. S1** Linear correlation between the experimental and calculated  $^{13}\text{C}$  NMR chemical shifts of  $[\text{Re}(\text{L}^1)(\text{CO})_3\text{Cl}]$ , **1**.

The complexes show three metal carbonyl resonances in the region 189–199 ppm which corroborates with the presence of pseudo  $C_{3v}$  *fac*- $[\text{Re}(\text{CO})_3]^+$  core.<sup>2</sup> The closely spaced

resonances (~ 199 and ~ 198 ppm) are assigned as equatorial carbonyls whereas the resonance ~ 190 ppm is due to the axial carbonyl group. The differences in chemical shift values can be attributed to different  $\pi$  accepting property of azo nitrogen, chlorine and sulfur atom. The  $^1\text{H}$  and  $^{13}\text{C}$  NMR spectral chemical shifts were calculated by GIAO-DFT method and the calculated chemical shifts are in good agreement with the experimental data. The correlation between the experimental and calculated  $^{13}\text{C}$  NMR chemical shift of complex **1** is shown in Fig. S1. The experimental and calculated  $^1\text{H}$  and  $^{13}\text{C}$  NMR data are given in the Experimental section.

**Table S1** Energies (eV) and composition (%) of frontier molecular orbitals of the complex  $[\text{Re}(\text{L}^2)(\text{CO})_3\text{Cl}]$ , **2** at ground state ( $\text{S}_0$ )

| Orbital  | Energy (eV) | Contribution (%) |      |              |      | Main bond type                                                                 |
|----------|-------------|------------------|------|--------------|------|--------------------------------------------------------------------------------|
|          |             | Re               | CO   | $\text{L}^2$ | Cl   |                                                                                |
| LUMO + 5 | -1.011      | 1.0              | 23.5 | 74.1         | 1.4  | $\pi^*(\text{CO}) + \pi^*(\text{L}^2)$                                         |
| LUMO + 4 | -1.098      | 4.1              | 6.4  | 88.0         | 1.5  | $\pi^*(\text{L}^2)$                                                            |
| LUMO + 3 | -1.483      | 8.9              | 28.9 | 61.7         | 0.5  | $\pi^*(\text{CO}) + \pi^*(\text{L}^2)$                                         |
| LUMO + 2 | -1.674      | 23.7             | 55.5 | 20.3         | 0.5  | $\text{p}(\text{Re}) + \pi^*(\text{CO}) + \pi^*(\text{L}^2)$                   |
| LUMO + 1 | -1.779      | 22.1             | 35.6 | 40.0         | 2.2  | $\text{p}(\text{Re}) + \pi^*(\text{CO}) + \pi^*(\text{L}^2)$                   |
| LUMO     | -3.591      | 1.3              | 2.9  | 94.1         | 1.6  | $\pi^*(\text{L}^2)$                                                            |
| HOMO     | -6.654      | 33.1             | 15.8 | 28.1         | 23.0 | $\text{d}(\text{Re}) + \pi(\text{CO}) + \pi(\text{L}^2) + \text{p}(\text{Cl})$ |
| HOMO - 1 | -6.770      | 42.7             | 19.6 | 10.9         | 26.8 | $\text{d}(\text{Re}) + \pi(\text{CO}) + \pi(\text{L}^2) + \text{p}(\text{Cl})$ |
| HOMO - 2 | -7.096      | 21.2             | 9.6  | 55.2         | 14.0 | $\text{d}(\text{Re}) + \pi(\text{L}^2) + \text{p}(\text{Cl})$                  |
| HOMO - 3 | -7.176      | 10.5             | 2.5  | 73.7         | 13.3 | $\text{d}(\text{Re}) + \pi(\text{L}^2) + \text{p}(\text{Cl})$                  |
| HOMO - 4 | -7.217      | 45.0             | 19.7 | 34.0         | 1.3  | $\text{d}(\text{Re}) + \pi(\text{CO}) + \pi(\text{L}^2)$                       |
| HOMO - 5 | -7.313      | 0.9              | 0.4  | 98.4         | 0.3  | $\pi(\text{L}^2)$                                                              |

**Table S2** Energies (eV) and composition (%) of frontier molecular orbitals of the complex [Re(L<sup>3</sup>)(CO)<sub>3</sub>Cl], **3** at ground state (S<sub>0</sub>)

| Orbital  | Energy (eV) | Contribution (%) |      |                |      | Main bond type                                                   |
|----------|-------------|------------------|------|----------------|------|------------------------------------------------------------------|
|          |             | Re               | CO   | L <sup>3</sup> | Cl   |                                                                  |
| LUMO + 5 | -1.280      | 2.4              | 10.8 | 86.5           | 0.2  | $\pi^*(\text{CO}) + \pi^*(\text{L}^3)$                           |
| LUMO + 4 | -1.535      | 9.0              | 28.8 | 61.8           | 0.4  | $\pi^*(\text{CO}) + \pi^*(\text{L}^3)$                           |
| LUMO + 3 | -1.705      | 23.1             | 56.5 | 20.3           | 0.1  | $p(\text{Re}) + \pi^*(\text{CO}) + \pi^*(\text{L}^3)$            |
| LUMO + 2 | -1.841      | 20.9             | 33.5 | 43.4           | 2.2  | $p(\text{Re}) + \pi^*(\text{CO}) + \pi^*(\text{L}^3)$            |
| LUMO + 1 | -3.406      | 1.4              | 1.9  | 96.3           | 0.4  | $\pi^*(\text{L}^3)$                                              |
| LUMO     | -4.005      | 1.1              | 2.3  | 96.2           | 0.4  | $\pi^*(\text{L}^3)$                                              |
| HOMO     | -6.794      | 44.1             | 20.2 | 7.6            | 28.1 | $d(\text{Re}) + \pi(\text{CO}) + p(\text{Cl})$                   |
| HOMO - 1 | -6.853      | 40.7             | 18.5 | 11.0           | 29.7 | $d(\text{Re}) + \pi(\text{CO}) + \pi(\text{L}^3) + p(\text{Cl})$ |
| HOMO - 2 | -7.172      | 7.6              | 2.9  | 83.3           | 6.1  | $\pi(\text{L}^3)$                                                |
| HOMO - 3 | -7.279      | 44.4             | 20.0 | 34.6           | 1.0  | $d(\text{Re}) + \pi(\text{CO}) + \pi(\text{L}^3)$                |
| HOMO - 4 | -7.331      | 9.1              | 4.0  | 86.9           | 0.0  | $\pi(\text{L}^3)$                                                |
| HOMO - 5 | -7.566      | 9.0              | 1.1  | 86.9           | 3.0  | $\pi(\text{L}^3)$                                                |

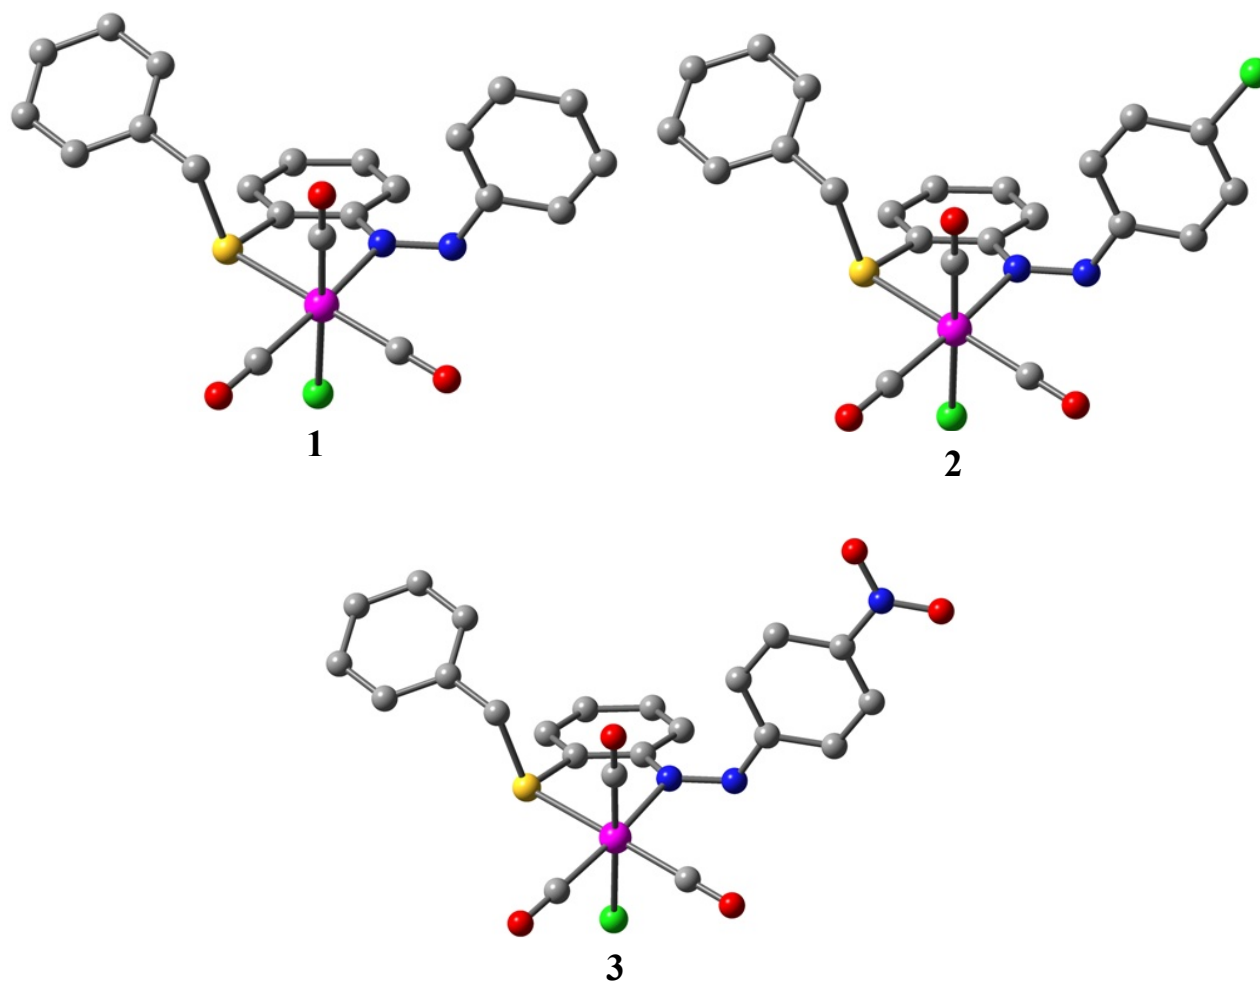

**Fig. S2** Optimized molecular structure of  $[\text{Re}(\text{L}^1)(\text{CO})_3\text{Cl}]$ , **1**;  $[\text{Re}(\text{L}^2)(\text{CO})_3\text{Cl}]$ , **2** and  $[\text{Re}(\text{L}^3)(\text{CO})_3\text{Cl}]$ , **3** at lowest lying triplet excited state ( $T_1$ ) (Re: Pink, Cl: Green, N: Blue, O: Red, S: Yellow, C: Grey). Hydrogen atoms are omitted for clarity.

**Table S3** Main calculated optical transition for complex  $[\text{Re}(\text{L}^2)(\text{CO})_3\text{Cl}]$ , **2** with composition in terms of molecular orbital contribution of the transition, vertical excitation energies and oscillator strength in dichloromethane

| Electronic Transitions   | Composition                     | Excitation energy     | Oscillator strength ( $f$ ) | CI <sup>a</sup> | Assign    | $\lambda_{\text{exp}}$ (nm) |
|--------------------------|---------------------------------|-----------------------|-----------------------------|-----------------|-----------|-----------------------------|
| $S_0 \rightarrow S_4$    | HOMO – 4 $\rightarrow$ LUMO     | 2.9236 eV<br>(424 nm) | 0.0846                      | 0.50844         | MLCT/ILCT | 416                         |
|                          | HOMO – 3 $\rightarrow$ LUMO     |                       |                             | –0.41666        | MLCT/ILCT |                             |
|                          | HOMO – 2 $\rightarrow$ LUMO     |                       |                             | –0.22208        | MLCT/ILCT |                             |
| $S_0 \rightarrow S_{10}$ | HOMO – 9 $\rightarrow$ LUMO     | 3.7121 eV<br>(334 nm) | 0.0550                      | 0.57855         | MLCT/ILCT | 314                         |
|                          | HOMO – 8 $\rightarrow$ LUMO     |                       |                             | 0.16174         | ILCT      |                             |
|                          | HOMO – 7 $\rightarrow$ LUMO     |                       |                             | –0.29772        | ILCT      |                             |
|                          | HOMO – 6 $\rightarrow$ LUMO     |                       |                             | 0.12068         | ILCT      |                             |
| $S_0 \rightarrow S_{34}$ | HOMO – 4 $\rightarrow$ LUMO + 2 | 5.1000 eV<br>(243 nm) | 0.0565                      | 0.12325         | MLCT/ILCT | 237                         |
|                          | HOMO – 3 $\rightarrow$ LUMO + 2 |                       |                             | 0.11064         | MLCT/ILCT |                             |
|                          | HOMO – 2 $\rightarrow$ LUMO + 2 |                       |                             | 0.25157         | MLCT/ILCT |                             |
|                          | HOMO – 1 $\rightarrow$ LUMO + 5 |                       |                             | –0.21136        | MLCT/ILCT |                             |

<sup>a</sup>Coefficient of the wave function for each excitations. The CI coefficients are in absolute values.

**Table S4** Main calculated optical transition for complex  $[\text{Re}(\text{L}^3)(\text{CO})_3\text{Cl}]$ , **3** with composition in terms of molecular orbital contribution of the transition, vertical excitation energies and oscillator strength in dichloromethane

| Electronic Transitions   | Composition                     | Excitation energy     | Oscillator strength ( $f$ ) | CI <sup>a</sup> | Assign    | $\lambda_{\text{exp}}$ (nm) |
|--------------------------|---------------------------------|-----------------------|-----------------------------|-----------------|-----------|-----------------------------|
| $S_0 \rightarrow S_2$    | HOMO – 1 $\rightarrow$ LUMO     | 2.2253 eV<br>(557 nm) | 0.0598                      | 0.65235         | MLCT/ILCT | 535                         |
|                          | HOMO $\rightarrow$ LUMO         |                       |                             | 0.20881         | MLCT/ILCT |                             |
| $S_0 \rightarrow S_{19}$ | HOMO – 3 $\rightarrow$ LUMO + 3 | 3.9725 eV<br>(312 nm) | 0.0094                      | 0.10961         | MLCT/ILCT | 307                         |
|                          | HOMO – 1 $\rightarrow$ LUMO + 3 |                       |                             | –0.12324        | MLCT/ILCT |                             |
|                          | HOMO $\rightarrow$ LUMO + 2     |                       |                             | 0.60149         | MLCT/ILCT |                             |
|                          | HOMO $\rightarrow$ LUMO + 4     |                       |                             | 0.26046         | MLCT/ILCT |                             |
| $S_0 \rightarrow S_{38}$ | HOMO – 3 $\rightarrow$ LUMO + 2 | 4.8449 eV<br>(256 nm) | 0.0947                      | –0.30755        | MLCT/ILCT | 261                         |
|                          | HOMO – 2 $\rightarrow$ LUMO + 2 |                       |                             | 0.57849         | LMCT/ILCT |                             |
|                          | HOMO – 2 $\rightarrow$ LUMO + 4 |                       |                             | –0.12810        | ILCT      |                             |

<sup>a</sup>Coefficient of the wave function for each excitations. The CI coefficients are in absolute values.

## References

- 1 R. W. Balk, D. J. Stufkens and A. Oskam, *J. Chem. Soc., Dalton Trans.*, 1981, 1124-1133.
- 2 F. Cloran, I. Carmichael and A. S. Serianni, *J. Am. Chem. Soc.*, 2001, **123**, 4781-4791.
